# Supplementary material for: Mutation Analysis of SARS-CoV-2 Variants Isolated from Symptomatic Cases from Andhra Pradesh, India
Source: MDPI journal article supplement (doi:10.3390/v15081656), 2023-07-29
Supplement: s1 [file s1]

### Supplementary Figures and Table

Due to their large size, the images and GIF videos are converted to pdf files. High-quality images

(supplementary Figures S1, S7, S8, and S9) and video files in GIF format (supplementary Figures S2–S6; 3D structure of Spike protein with mutations labeled) and master table can be downloaded from the below link. <https://zenodo.org/search?page=1&size=20&q=8046107>

Title: supplementary figures for the manuscript titled "Mutation Analysis of SARS CoV2 Variants Isolated from Symptomatic Cases from Andhra Pradesh, India."

<https://doi.org/10.5281/zenodo.8046107>

Supplementary Table S1. Master data of the study representing variants and their mutations and the number of interactions between the spike and the receptor generated from the molecular dynamic studies performed on each sample nucleotide sequence and the standard ACE2 receptor

| Sl. No. | Sample_ID     | Collection date | Group | Pango lineage | Clade | Variant | NA_Sub | NA_Del | AA_Sub | AA_Del | Genbank acc no. | Dope score  | RMSE  | Interactions within spike |            | Interactions (spike-hACE2) |            |
|---------|---------------|-----------------|-------|---------------|-------|---------|--------|--------|--------|--------|-----------------|-------------|-------|---------------------------|------------|----------------------------|------------|
|         |               |                 |       |               |       |         |        |        |        |        |                 |             |       | bonded                    | non-bonded | bonded                     | non-bonded |
| 1       | SVIMS_543985  | 30.03.2021      | G9    | B.1.1.7       | 20I   | Alpha   | 7      | 9      | 7      | 3      | ON651722        | -411547.719 | 0.228 | 212                       | 1821       | 29                         | 282        |
| 2       | SVIMS_554429  | 06.04.2021      | G9    | B.1.1.7.8     | 20I   | Alpha   | 8      | 9      | 7      | 3      | ON668149        | -411547.719 | 0.228 | 212                       | 1821       | 29                         | 282        |
| 3       | SVIMS_505054  | 09.03.2021      | G58   | B.1.1.7.4     | 20I   | Alpha   | 6      | 9      | 6      | 3      | ON668143        | -411595.375 | 0.208 | 209                       | 1776       | 12                         | 176        |
| 4       | SVIMS_35599   | 28.05.2021      | G34   | B.1.1.7.8     | 20I   | Alpha   | 9      | 9      | 8      | 3      | ON651697        | -411980.344 | 0.193 | 225                       | 1837       | 19                         | 266        |
| 5       | SVIMS_735971  | 28.05.2021      | G9    | B.1.1.7.8     | 20I   | Alpha   | 8      | 9      | 7      | 3      | ON651698        | -411547.719 | 0.228 | 212                       | 1821       | 29                         | 282        |
| 6       | SVIMS_539168  | 27.03.2021      | G9    | B.1.1.7       | 20I   | Alpha   | 7      | 9      | 7      | 3      | ON651700        | -411547.719 | 0.228 | 212                       | 1821       | 29                         | 282        |
| 7       | SVIMS_539176  | 27.03.2021      | G9    | B.1.1.7       | 20I   | Alpha   | 8      | 9      | 7      | 3      | ON651701        | -411547.719 | 0.228 | 212                       | 1821       | 29                         | 282        |
| 8       | SVIMS_543243  | 31.03.2021      | G9    | B.1.1.7       | 20I   | Alpha   | 7      | 9      | 7      | 3      | ON651709        | -411547.719 | 0.228 | 212                       | 1821       | 29                         | 282        |
| 9       | SVIMS_543265  | 31.03.2021      | G42   | B.1.1.7       | 20I   | Alpha   | 6      | 9      | 6      | 3      | ON651710        | -411691.781 | 0.212 | 219                       | 1850       | 15                         | 251        |
| 10      | SVIMS_43889   | 30.03.2021      | G9    | B.1.1.7.8     | 20I   | Alpha   | 8      | 9      | 7      | 3      | ON651715        | -411547.719 | 0.228 | 212                       | 1821       | 29                         | 282        |
| 11      | SVIMS_543894  | 30.03.2021      | G9    | B.1.1.7       | 20I   | Alpha   | 7      | 9      | 7      | 3      | ON651716        | -411547.719 | 0.228 | 212                       | 1821       | 29                         | 282        |
| 12      | SVIMS_543905  | 30.03.2021      | G46   | B.1.1.7       | 20I   | Alpha   | 9      | 6      | 10     | 2      | ON651717        | -410893.219 | 0.223 | 222                       | 1822       | 19                         | 186        |
| 13      | SVIMS_46931   | 02.04.2021      | G9    | B.1.1.7.8     | 20I   | Alpha   | 8      | 9      | 7      | 3      | ON668134        | -411547.719 | 0.228 | 212                       | 1821       | 29                         | 282        |
| 14      | SVIMS_551012  | 04.04.2021      | G59   | B.1.1.7       | 20I   | Alpha   | 6      | 9      | 6      | 3      | ON668144        | -412179.312 | 0.256 | 206                       | 1853       | 11                         | 146        |
| 15      | SVIMS_544029  | 30.03.2021      | G50   | B.1.617.2.4   | 21J   | Delta   | 7      | 6      | 8      | 2      | ON668129        | -410052.281 | 0.242 | 206                       | 1752       | 10                         | 156        |
| 16      | SVIMS_543587  | 31.03.2021      | G44   | B.1.617.2.35  | 21A   | Delta   | 9      | 6      | 10     | 2      | ON651712        | -410459.844 | 0.23  | 206                       | 1783       | 22                         | 205        |
| 17      | SVIMS_549070  | 03.04.2021      | G57   | B.1.617.2.4   | 21J   | Delta   | 9      | 6      | 10     | 2      | ON668142        | -410400.125 | 0.193 | 220                       | 1804       | 19                         | 265        |
| 18      | SVIMS_1444551 | 20.11.2021      | G1    | B.1.617.2.4   | 21J   | Delta   | 11     | 6      | 10     | 2      | ON644350        | -410901.438 | 0.193 | 202                       | 1787       | 20                         | 297        |
| 19      | SVIMS_1446548 | 21.11.2021      | G1    | B.1.617.2.4   | 21J   | Delta   | 11     | 6      | 10     | 2      | ON644351        | -410901.438 | 0.193 | 202                       | 1787       | 20                         | 297        |
| 20      | SVIMS_1468869 | 03.12.2021      | G1    | B.1.617.2.4   | 21J   | Delta   | 11     | 6      | 10     | 2      | ON644352        | -410901.438 | 0.193 | 202                       | 1787       | 20                         | 297        |

Supplementary Table S1. Master data of the study representing variants and their mutations and the number of interactions between the spike and the receptor generated from the molecular dynamic studies performed on each sample nucleotide sequence and the standard ACE2 receptor

| Sl. No. | Sample_ID     | Collection date | Group | Pango lineage  | Clade | Variant | NA_Sub | NA_Del | AA_Sub | AA_Del | Genbank acc no. | Dope score  | RMSE  | Interactions within spike |            | Interactions (spike-hACE2) |            |
|---------|---------------|-----------------|-------|----------------|-------|---------|--------|--------|--------|--------|-----------------|-------------|-------|---------------------------|------------|----------------------------|------------|
|         |               |                 |       |                |       |         |        |        |        |        |                 |             |       | bonded                    | non-bonded | bonded                     | non-bonded |
| 21      | SVIMS_1486179 | 10.12.2021      | G12   | B.1.617.2.4    | 21J   | Delta   | 10     | 6      | 10     | 2      | ON644353        | -408948.938 | 0.264 | 212                       | 1830       | 8                          | 123        |
| 22      | SVIMS_1500968 | 16.12.2021      | G15   | B.1.617.2.4    | 21J   | Delta   | 10     | 6      | 9      | 2      | ON644358        | -410296.75  | 0.179 | 203                       | 1797       | 22                         | 263        |
| 23      | SVIMS_1507657 | 18.12.2021      | G13   | B.1.617.2.4    | 21J   | Delta   | 10     | 6      | 10     | 2      | ON644354        | -411319.312 | 0.209 | 211                       | 1766       | 12                         | 226        |
| 24      | SVIMS_1508528 | 18.12.2021      | G14   | B.1.617.2.4    | 21J   | Delta   | 13     | 6      | 11     | 2      | ON644355        | -409678.438 | 0.205 | 204                       | 1825       | 17                         | 192        |
| 25      | SVIMS_1508534 | 18.12.2021      | G15   | B.1.617.2.4    | 21J   | Delta   | 10     | 6      | 9      | 2      | ON644356        | -410296.75  | 0.179 | 203                       | 1797       | 22                         | 263        |
| 26      | SVIMS_1509454 | 20.12.2021      | G16   | B.1.617.2.4    | 21J   | Delta   | 9      | 6      | 10     | 2      | ON644357        | -409594.438 | 0.244 | 217                       | 1752       | 31                         | 233        |
| 27      | SVIMS_1534704 | 29.12.2021      | G17   | B.1.617.2.4    | 21J   | Delta   | 10     | 6      | 10     | 2      | ON644359        | -409987.75  | 0.179 | 217                       | 1752       | 31                         | 233        |
| 28      | SVIMS_1553168 | 05.01.2022      | G21   | B.1.617.2.4    | 21J   | Delta   | 9      | 9      | 10     | 3      | ON644366        | -410146.875 | 0.22  | 221                       | 1858       | 23                         | 250        |
| 29      | SVIMS_735516  | 28.05.2021      | G32   | B.1.617.2.4    | 21J   | Delta   | 11     | 6      | 12     | 2      | ON651695        | -410369.719 | 0.19  | 219                       | 1816       | 18                         | 203        |
| 30      | SVIMS_735522  | 28.05.2021      | G33   | B.1.617.2.44   | 21J   | Delta   | 9      | 6      | 9      | 2      | ON651696        | -409283.031 | 0.199 | 210                       | 1743       | 21                         | 278        |
| 31      | SVIMS_736318  | 28.05.2021      | G35   | B.1.617.2.27   | 21I   | Delta   | 8      | 6      | 9      | 2      | ON651699        | -409462.781 | 0.247 | 204                       | 1737       | 25                         | 296        |
| 32      | SVIMS_243059  | 05.11.2020      | G39   | B.1.617.2      | 21A   | Delta   | 8      | 6      | 9      | 2      | ON651706        | -410077.312 | 0.207 | 213                       | 1888       | 16                         | 291        |
| 33      | SVIMS_543502  | 31.03.2021      | G43   | B.1.617.2.35   | 21A   | Delta   | 9      | 6      | 10     | 2      | ON651711        | -409898.562 | 0.209 | 229                       | 1872       | 15                         | 227        |
| 34      | SVIMS_543762  | 31.03.2021      | G45   | B.1.617.2      | 21A   | Delta   | 11     | 6      | 12     | 2      | ON651714        | -410329.25  | 0.179 | 203                       | 1715       | 43                         | 423        |
| 35      | SVIMS_543938  | 30.03.2021      | G3    | B.1.617.2.27   | 21I   | Delta   | 8      | 6      | 9      | 2      | ON651718        | -411474.344 | 0.239 | 210                       | 1777       | 17                         | 171        |
| 36      | SVIMS_543940  | 30.03.2021      | G2    | B.1.617.2.44   | 21J   | Delta   | 7      | 6      | 8      | 2      | ON651719        | -410636.062 | 0.195 | 222                       | 1898       | 17                         | 183        |
| 37      | SVIMS_543953  | 30.03.2021      | G39   | B.1.617.2      | 21A   | Delta   | 8      | 6      | 9      | 2      | ON651720        | -410077.312 | 0.207 | 213                       | 1888       | 16                         | 291        |
| 38      | SVIMS_543964  | 30.03.2021      | G47   | B.1.617.2.99.2 | 21J   | Delta   | 7      | 0      | 7      | 0      | ON651721        | -411122.125 | 0.228 | 224                       | 1878       | 14                         | 159        |
| 39      | SVIMS_543993  | 30.03.2021      | G48   | B.1.617.2.99.2 | 21J   | Delta   | 5      | 9      | 5      | 3      | ON651723        | -410278.25  | 0.236 | 205                       | 1784       | 9                          | 221        |
| 40      | SVIMS_544018  | 30.03.2021      | G39   | B.1.617.2      | 21A   | Delta   | 8      | 6      | 9      | 2      | ON668127        | -410077.312 | 0.207 | 213                       | 1888       | 16                         | 291        |

Supplementary Table S1. Master data of the study representing variants and their mutations and the number of interactions between the spike and the receptor generated from the molecular dynamic studies performed on each sample nucleotide sequence and the standard ACE2 receptor

| Sl. No. | Sample_ID     | Collection date | Group | Pango lineage | Clade | Variant | NA_Sub | NA_Del | AA_Sub | AA_Del | Genbank acc no. | Dope score  | RMSE  | Interactions within spike |            | Interactions (spike-hACE2) |            |
|---------|---------------|-----------------|-------|---------------|-------|---------|--------|--------|--------|--------|-----------------|-------------|-------|---------------------------|------------|----------------------------|------------|
|         |               |                 |       |               |       |         |        |        |        |        |                 |             |       | bonded                    | non-bonded | bonded                     | non-bonded |
| 41      | SVIMS_544061  | 31.03.2021      | G39   | B.1.617.2     | 21A   | Delta   | 8      | 6      | 9      | 2      | ON668130        | -410077.312 | 0.207 | 213                       | 1888       | 16                         | 291        |
| 42      | SVIMS_549013  | 03.04.2021      | G39   | B.1.617.2     | 21A   | Delta   | 9      | 6      | 9      | 2      | ON668136        | -410077.312 | 0.207 | 213                       | 1888       | 16                         | 291        |
| 43      | SVIMS_549022  | 03.04.2021      | G2    | B.1.617.2.44  | 21J   | Delta   | 7      | 6      | 8      | 2      | ON668138        | -410636.062 | 0.195 | 222                       | 1898       | 17                         | 183        |
| 44      | SVIMS_549026  | 03.04.2021      | G4    | B.1.617.2     | 21A   | Delta   | 9      | 6      | 10     | 2      | ON668139        | -410642.219 | 0.228 | 220                       | 1868       | 20                         | 260        |
| 45      | SVIMS_549068  | 03.04.2021      | G56   | B.1.617.2.44  | 21J   | Delta   | 8      | 6      | 9      | 2      | ON668141        | -410003.219 | 0.219 | 216                       | 1812       | 16                         | 182        |
| 46      | SVIMS_551534  | 04.04.2021      | G60   | B.1.617.2     | 21A   | Delta   | 10     | 6      | 11     | 2      | ON668145        | -410252.281 | 0.252 | 205                       | 1802       | 12                         | 160        |
| 47      | SVIMS_552567  | 05.04.2021      | G61   | B.1.617.2     | 21A   | Delta   | 12     | 7      | 12     | 3      | ON668146        | -409717.844 | 0.233 | 214                       | 1802       | 14                         | 173        |
| 48      | SVIMS_554417  | 06.04.2021      | G51   | B.1.617.2.44  | 21J   | Delta   | 8      | 0      | 7      | 0      | ON668148        | -411427.312 | 0.2   | 230                       | 1838       | 32                         | 231        |
| 49      | SVIMS_664025  | 12.05.2021      | G4    | B.1.617.2     | 21A   | Delta   | 9      | 6      | 10     | 2      | ON668152        | -410642.219 | 0.228 | 220                       | 1868       | 20                         | 260        |
| 50      | SVIMS_664027  | 12.05.2021      | G3    | B.1.617.2.27  | 21I   | Delta   | 8      | 6      | 9      | 2      | ON668153        | -411474.344 | 0.239 | 210                       | 1777       | 17                         | 171        |
| 51      | SVIMS_664069  | 12.05.2021      | G1    | B.1.617.2.4   | 21J   | Delta   | 11     | 6      | 10     | 2      | ON668154        | -410901.438 | 0.193 | 202                       | 1787       | 20                         | 297        |
| 52      | SVIMS_1497945 | 15.12.2021      | G65   | B.1.617.2.4   | 21J   | Delta   | 10     | 6      | 10     | 2      | ON668157        | -410410.875 | 0.252 | 207                       | 1822       | 16                         | 223        |
| 53      | SVIMS_539383  | 27.03.2021      | G36   | B.1.617.1     | 21B   | Kappa   | 9      | 0      | 8      | 0      | ON651702        | -411562.406 | 0.222 | 222                       | 1843       | 18                         | 279        |
| 54      | SVIMS_539420  | 27.03.2021      | G38   | B.1.617.1     | 21B   | Kappa   | 13     | 0      | 10     | 0      | ON651704        | -416234.688 | 0.234 | 210                       | 1864       | 12                         | 179        |
| 55      | SVIMS_544020  | 30.03.2021      | G7    | B.1.617.1     | 21B   | Kappa   | 10     | 0      | 8      | 0      | ON668128        | -411933.812 | 0.205 | 210                       | 1768       | 11                         | 189        |
| 56      | SVIMS_44575   | 01.04.2021      | G52   | B.1.617.1     | 21B   | Kappa   | 10     | 0      | 9      | 0      | ON668131        | -411200.156 | 0.187 | 211                       | 1860       | 16                         | 219        |
| 57      | SVIMS_46696   | 01.04.2021      | G53   | B.1.617.1     | 21B   | Kappa   | 10     | 0      | 9      | 0      | ON668133        | -411386.219 | 0.188 | 210                       | 1795       | 11                         | 178        |
| 58      | SVIMS_547642  | 02.04.2021      | G7    | B.1.617.1     | 21B   | Kappa   | 9      | 0      | 8      | 0      | ON668135        | -411933.812 | 0.205 | 210                       | 1768       | 11                         | 189        |
| 59      | SVIMS_549020  | 03.04.2021      | G54   | B.1.617.1     | 21B   | Kappa   | 9      | 0      | 8      | 0      | ON668137        | -411777.219 | 0.189 | 203                       | 1785       | 22                         | 218        |
| 60      | SVIMS_554410  | 06.04.2021      | G7    | B.1.617.1     | 21B   | Kappa   | 9      | 0      | 8      | 0      | ON668147        | -411933.812 | 0.205 | 210                       | 1768       | 11                         | 189        |

Supplementary Table S1. Master data of the study representing variants and their mutations and the number of interactions between the spike and the receptor generated from the molecular dynamic studies performed on each sample nucleotide sequence and the standard ACE2 receptor

| Sl. No. | Sample_ID     | Collection date | Group | Pango lineage | Clade | Variant | NA_Sub | NA_Del | AA_Sub | AA_Del | Genbank acc no. | Dope score  | RMSE  | Interactions within spike |            | Interactions (spike-hACE2) |            |
|---------|---------------|-----------------|-------|---------------|-------|---------|--------|--------|--------|--------|-----------------|-------------|-------|---------------------------|------------|----------------------------|------------|
|         |               |                 |       |               |       |         |        |        |        |        |                 |             |       | bonded                    | non-bonded | bonded                     | non-bonded |
| 61      | SVIMS_1595310 | 22.01.2022      | G6    | BA.2          | 21L   | Omicron | 28     | 9      | 28     | 3      | ON668156        | -413835.125 | 0.242 | 204                       | 1843       | 36                         | 375        |
| 62      | SVIMS_1538474 | 30.12.2021      | G6    | BA.2          | 21L   | Omicron | 28     | 9      | 28     | 3      | ON644360        | -413835.125 | 0.242 | 204                       | 1843       | 36                         | 375        |
| 63      | SVIMS_1538475 | 30.12.2021      | G6    | BA.2          | 21L   | Omicron | 28     | 9      | 28     | 3      | ON644361        | -413835.125 | 0.242 | 204                       | 1843       | 36                         | 375        |
| 64      | SVIMS_1540933 | 31.12.2021      | G6    | BA.2          | 21L   | Omicron | 29     | 9      | 28     | 3      | ON644362        | -413835.125 | 0.242 | 204                       | 1843       | 36                         | 375        |
| 65      | SVIMS_1541972 | 01.01.2022      | G19   | BA.2          | 21L   | Omicron | 27     | 9      | 27     | 3      | ON644364        | -412805.906 | 0.244 | 194                       | 1824       | 9                          | 143        |
| 66      | SVIMS_1544626 | 03.01.2022      | G20   | BA.2          | 21L   | Omicron | 26     | 9      | 26     | 3      | ON644365        | -412622.594 | 0.291 | 208                       | 1738       | 27                         | 312        |
| 67      | SVIMS_1553815 | 05.01.2022      | G22   | BA.2          | 21L   | Omicron | 29     | 9      | 29     | 3      | ON644367        | -412623.594 | 0.254 | 217                       | 1877       | 39                         | 356        |
| 68      | SVIMS_1553846 | 05.01.2022      | G11   | BA.2          | 21L   | Omicron | 27     | 9      | 27     | 3      | ON644368        | -412443.656 | 0.275 | 199                       | 1797       | 11                         | 166        |
| 69      | SVIMS_1553939 | 05.01.2022      | G6    | BA.2          | 21L   | Omicron | 28     | 9      | 28     | 3      | ON644369        | -413835.125 | 0.242 | 204                       | 1843       | 36                         | 375        |
| 70      | SVIMS_1554002 | 05.01.2022      | G23   | BA.2          | 21L   | Omicron | 29     | 9      | 29     | 3      | ON644370        | -412792.938 | 0.274 | 210                       | 1817       | 17                         | 194        |
| 71      | SVIMS_1554016 | 05.01.2022      | G24   | BA.2          | 21L   | Omicron | 27     | 9      | 27     | 3      | ON644371        | -412558.25  | 0.252 | 205                       | 1784       | 9                          | 221        |
| 72      | SVIMS_1565444 | 08.01.2022      | G5    | BA.2.10.1     | 21L   | Omicron | 29     | 9      | 29     | 3      | ON644373        | -414187.125 | 0.292 | 197                       | 1806       | 24                         | 328        |
| 73      | SVIMS_1566269 | 09.01.2022      | G26   | BA.2          | 21L   | Omicron | 25     | 9      | 25     | 3      | ON644374        | -412198.844 | 0.262 | 208                       | 1812       | 29                         | 257        |
| 74      | SVIMS_1567457 | 10.01.2022      | G27   | BA.1.1.16     | 21K   | Omicron | 20     | 15     | 19     | 5      | ON644375        | -411964.812 | 0.196 | 207                       | 1804       | 19                         | 275        |
| 75      | SVIMS_1599159 | 22.01.2022      | G6    | BA.2          | 21L   | Omicron | 28     | 9      | 28     | 3      | ON644376        | -413835.125 | 0.242 | 204                       | 1843       | 36                         | 375        |
| 76      | SVIMS_1602781 | 28.01.2022      | G29   | BA.2          | 21L   | Omicron | 25     | 9      | 25     | 3      | ON644378        | -412126.938 | 0.282 | 217                       | 1816       | 34                         | 298        |
| 77      | SVIMS_1602786 | 28.01.2022      | G6    | BA.2          | 21L   | Omicron | 28     | 9      | 28     | 3      | ON644379        | -413835.125 | 0.242 | 204                       | 1843       | 36                         | 375        |
| 78      | SVIMS_1602788 | 28.01.2022      | G6    | BA.2          | 21L   | Omicron | 28     | 9      | 28     | 3      | ON644380        | -413835.125 | 0.242 | 204                       | 1843       | 36                         | 375        |
| 79      | SVIMS_1602814 | 28.01.2022      | G5    | BA.2.10.1     | 21L   | Omicron | 29     | 9      | 29     | 3      | ON644381        | -414187.125 | 0.292 | 197                       | 1806       | 24                         | 328        |
| 80      | SVIMS_1602852 | 28.01.2022      | G5    | BA.2.10.1     | 21L   | Omicron | 29     | 9      | 29     | 3      | ON644382        | -414187.125 | 0.292 | 197                       | 1806       | 24                         | 328        |

Supplementary Table S1. Master data of the study representing variants and their mutations and the number of interactions between the spike and the receptor generated from the molecular dynamic studies performed on each sample nucleotide sequence and the standard ACE2 receptor

| Sl. No. | Sample_ID     | Collection date | Group | Pango lineage | Clade | Variant | NA_Sub | NA_Del | AA_Sub | AA_Del | Genbank acc no. | Dope score  | RMSE  | Interactions within spike |            | Interactions (spike-hACE2) |            |
|---------|---------------|-----------------|-------|---------------|-------|---------|--------|--------|--------|--------|-----------------|-------------|-------|---------------------------|------------|----------------------------|------------|
|         |               |                 |       |               |       |         |        |        |        |        |                 |             |       | bonded                    | non-bonded | bonded                     | non-bonded |
| 81      | SVIMS_1602853 | 28.01.2022      | G30   | BA.2          | 21L   | Omicron | 28     | 9      | 28     | 3      | ON644383        | -412465.656 | 0.239 | 185                       | 1769       | 15                         | 285        |
| 82      | SVIMS_1605030 | 01.02.2022      | G6    | BA.2          | 21L   | Omicron | 28     | 9      | 28     | 3      | ON644384        | -413835.125 | 0.242 | 204                       | 1843       | 36                         | 375        |
| 83      | SVIMS_1607478 | 03.02.2022      | G11   | BA.2          | 21L   | Omicron | 27     | 9      | 27     | 3      | ON651690        | -412443.656 | 0.275 | 199                       | 1797       | 11                         | 166        |
| 84      | SVIMS_1616911 | 24.02.2022      | G6    | BA.2          | 21L   | Omicron | 28     | 9      | 28     | 3      | ON651691        | -413835.125 | 0.242 | 204                       | 1843       | 36                         | 375        |
| 85      | SVIMS_1616944 | 24.02.2022      | G8    | BA.2          | 21L   | Omicron | 29     | 9      | 29     | 3      | ON651692        | -412888.625 | 0.237 | 212                       | 1825       | 23                         | 295        |
| 86      | SVIMS_17514   | 25.02.2022      | G8    | BA.2          | 21L   | Omicron | 29     | 9      | 29     | 3      | ON651693        | -412888.625 | 0.237 | 212                       | 1825       | 23                         | 295        |
| 87      | SVIMS_1623722 | 29.02.2022      | G31   | BA.2.56       | 21L   | Omicron | 29     | 9      | 29     | 3      | ON651694        | -412066.906 | 0.251 | 206                       | 1793       | 17                         | 320        |
| 88      | SVIMS_543592  | 31.03.2021      | G6    | BA.2          | 21L   | Omicron | 27     | 9      | 28     | 3      | ON651713        | -413835.125 | 0.242 | 204                       | 1843       | 36                         | 375        |
| 89      | SVIMS_1599154 | 22.01.2022      | G6    | BA.2          | 21L   | Omicron | 28     | 9      | 28     | 3      | ON668158        | -413835.125 | 0.242 | 204                       | 1843       | 36                         | 375        |
| 90      | SVIMS_1599160 | 22.01.2022      | G66   | BA.2          | 21L   | Omicron | 27     | 9      | 26     | 3      | ON668159        | -412772.375 | 0.238 | 219                       | 1816       | 18                         | 203        |
| 91      | SVIMS_1599206 | 22.01.2022      | G6    | BA.2          | 21L   | Omicron | 28     | 9      | 28     | 3      | ON668160        | -413835.125 | 0.242 | 204                       | 1843       | 36                         | 375        |
| 92      | SVIMS_539385  | 27.03.2021      | G37   | B.1.617       | 20A   | unnamed | 5      | 9      | 5      | 3      | ON651703        | -411292.969 | 0.225 | 226                       | 1846       | 16                         | 228        |
| 93      | SVIMS_1606063 | 01.02.2022      | G63   | XU            | RC    | RC      | 23     | 9      | 23     | 3      | ON668151        | -412294.5   | 0.293 | 212                       | 1860       | 19                         | 307        |
| 94      | SVIMS_1608329 | 04.02.2022      | G64   | XU            | RC    | RC      | 17     | 0      | 16     | 0      | ON668155        | -413039.125 | 0.236 | 224                       | 1853       | 17                         | 225        |
| 95      | SVIMS_1541235 | 31.12.2021      | G18   | B.1           | 20A   | unnamed | 8      | 9      | 8      | 3      | ON644363        | -411003.469 | 0.271 | 210                       | 1787       | 20                         | 234        |
| 96      | SVIMS_1562054 | 07.01.2022      | G25   | B.1.551       | 20A   | unnamed | 5      | 15     | 6      | 5      | ON644372        | -410463.375 | 0.237 | 209                       | 1775       | 11                         | 182        |
| 97      | SVIMS_242746  | 05.11.2020      | G10   | B.1.36        | 20A   | unnamed | 3      | 0      | 2      | 0      | ON651705        | -413198.594 | 0.204 | 216                       | 1760       | 15                         | 201        |
| 98      | SVIMS_543113  | 29.03.2021      | G40   | B.1.551       | 20A   | unnamed | 6      | 9      | 6      | 3      | ON651707        | -410407.812 | 0.204 | 216                       | 1838       | 11                         | 220        |
| 99      | SVIMS_543983  | 30.03.2021      | G41   | B.1.36        | 20A   | unnamed | 2      | 9      | 1      | 3      | ON651708        | -411628.906 | 0.195 | 189                       | 1726       | 21                         | 247        |
| 100     | SVIMS_544017  | 30.03.2021      | G49   | B.1.617       | 20A   | unnamed | 4      | 0      | 4      | 0      | ON651724        | -411191     | 0.232 | 204                       | 1853       | 14                         | 261        |



Supplementary Table S2. Comparison of the frequency and percentage of each amino acid substitution reported in the study with the local, national, and global occurrence of the same mutation

| SL.NO | AA Mutation | Mutation ratio* | Number of mutations reported (percentage) |                |                |                  |
|-------|-------------|-----------------|-------------------------------------------|----------------|----------------|------------------|
|       |             |                 | Present study                             | Andhra Pradesh | INDIA          | Global           |
| 1     | S:L5F       | 0.57            | 1(0.96)                                   | 130(1.122)     | 2669(0.913)    | 268094(1.701)    |
| 2     | S:Q14H      | 15.44           | 1(0.962)                                  | 17(0.147)      | 193(0.066)     | 9816(0.062)      |
| 3     | S:L18F      | 0.58            | 1(0.962)                                  | 33(0.285)      | 1200(0.41)     | 263403(1.671)    |
| 4     | S:T19R      | 0.84            | 25(24.038)                                | 5149(44.422)   | 93957(32.135)  | 4517977(28.658)  |
| 5     | S:T19I      | 0.50            | 18(17.308)                                | 2836(24.467)   | 109478(37.443) | 5505540(34.922)  |
| 6     | S:A27S      | 0.53            | 19(18.269)                                | 45(0.388)      | 74423(25.454)  | 5407981(34.303)  |
| 7     | S:H49Y      | 7.77            | 1(0.962)                                  | 16(0.138)      | 430(0.147)     | 19503(0.124)     |
| 8     | S:A67V      | 0.12            | 2(1.923)                                  | 46(0.397)      | 12570(4.299)   | 2549642(16.173)  |
| 9     | S:K77T      | 75.32           | 8(7.692)                                  | 83(0.716)      | 1592(0.544)    | 16100(0.102)     |
| 10    | S:T95I      | 0.60            | 17(16.346)                                | 1963(16.936)   | 43125(14.749)  | 4290142(27.213)  |
| 11    | S:G142D     | 0.69            | 50(48.077)                                | 3992(34.441)   | 148735(50.87)  | 10960428(69.523) |
| 12    | S:Y145D     | 0.12            | 2(1.923)                                  | 12(0.104)      | 6948(2.376)    | 2436966(15.458)  |
| 13    | S:H146Y     | 19.74           | 1(0.962)                                  | 0(0)           | 96(0.033)      | 7678(0.049)      |
| 14    | S:E154K     | 129.47          | 6(5.769)                                  | 40(0.345)      | 4126(1.411)    | 7025(0.045)      |
| 15    | S:R158G     | 125.43          | 24(23.077)                                | 1(0.009)       | 903(0.309)     | 29006(0.184)     |
| 16    | S:V213G     | 43.47           | 20(19.231)                                | 2917(25.166)   | 93131(31.852)  | 69740(0.442)     |
| 17    | S:A222V     | 0.47            | 2(1.923)                                  | 285(2.459)     | 10468(3.58)    | 650702(4.127)    |
| 18    | S:A262S     | 4.50            | 1(0.962)                                  | 5(0.043)       | 537(0.184)     | 33696(0.214)     |
| 19    | S:A263P     | 1378.07         | 1(0.962)                                  | 0(0)           | 8(0.003)       | 110(0.001)       |
| 20    | S:G339D     | 0.36            | 17(16.346)                                | 3424(29.54)    | 103769(35.491) | 7234710(45.891)  |
| 21    | S:S371F     | 0.45            | 16(15.385)                                | 2633(22.716)   | 109783(37.548) | 5400421(34.256)  |
| 22    | S:S373P     | 0.33            | 17(16.346)                                | 2761(23.82)    | 119438(40.85)  | 7713393(48.927)  |
| 23    | S:S375F     | 0.34            | 17(16.346)                                | 2708(23.363)   | 117466(40.175) | 7689189(48.773)  |
| 24    | S:T376A     | 0.48            | 17(16.346)                                | 2547(21.974)   | 107872(36.894) | 5403417(34.275)  |
| 25    | S:V382L     | 43.08           | 1(0.962)                                  | 5(0.043)       | 633(0.216)     | 3519(0.022)      |
| 26    | S:D405N     | 0.44            | 16(15.385)                                | 3298(28.453)   | 113776(38.913) | 5477614(34.745)  |
| 27    | S:R408S     | 0.46            | 16(15.385)                                | 3287(28.358)   | 100248(34.287) | 5221564(33.121)  |
| 28    | S:K417N     | 0.35            | 16(15.385)                                | 3256(28.091)   | 106024(36.262) | 7017467(44.513)  |
| 29    | S:N440K     | 0.37            | 17(16.346)                                | 2728(23.536)   | 90547(30.969)  | 6880206(43.642)  |
| 30    | S:K444R     | 5.69            | 1(0.962)                                  | 12(0.104)      | 448(0.153)     | 26643(0.169)     |
| 31    | S:L452M     | 4.30            | 1(0.962)                                  | 26(0.224)      | 1527(0.522)    | 35293(0.224)     |
| 32    | S:L452R     | 0.74            | 35(33.654)                                | 5954(51.367)   | 102166(34.943) | 7144229(45.317)  |
| 33    | S:S477N     | 0.35            | 18(17.308)                                | 2676(23.087)   | 96195(32.9)    | 7780450(49.352)  |
| 34    | S:T478K     | 0.54            | 43(41.346)                                | 8367(72.185)   | 178664(61.106) | 12165046(77.164) |
| 35    | S:N481K     | 86.03           | 1(0.962)                                  | 0(0)           | 25(0.009)      | 1762(0.011)      |
| 36    | S:E484A     | 0.39            | 20(19.231)                                | 2768(23.881)   | 95381(32.622)  | 7698745(48.834)  |
| 37    | S:E484Q     | 59.44           | 10(9.615)                                 | 423(3.649)     | 9710(3.321)    | 25504(0.162)     |
| 38    | S:Q493R     | 0.65            | 19(18.269)                                | 2158(18.618)   | 58296(19.938)  | 4439904(28.163)  |
| 39    | S:G496S     | 0.07            | 1(0.962)                                  | 104(0.897)     | 6918(2.366)    | 2240656(14.213)  |
| 40    | S:Q498R     | 0.38            | 19(18.269)                                | 2271(19.593)   | 90487(30.948)  | 7567779(48.003)  |
| 41    | S:N501Y     | 0.62            | 37(35.577)                                | 2452(21.154)   | 97637(33.394)  | 9012309(57.166)  |
| 42    | S:Y505H     | 0.38            | 19(18.269)                                | 2774(23.932)   | 93282(31.904)  | 7583783(48.105)  |



Supplementary Table S2. Comparison of the frequency and percentage of each amino acid substitution reported in the study with the local, national, and global occurrence of the same mutation

| SL.NO | AA Mutation | Mutation ratio* | Number of mutations reported (percentage) |                |                |                  |
|-------|-------------|-----------------|-------------------------------------------|----------------|----------------|------------------|
|       |             |                 | Present study                             | Andhra Pradesh | INDIA          | Global           |
| 43    | S:V511I     | 253.07          | 1(0.962)                                  | 0(0)           | 7(0.002)       | 599(0.004)       |
| 44    | S:T547K     | 0.06            | 1(0.962)                                  | 366(3.158)     | 14173(4.847)   | 2598710(16.484)  |
| 45    | S:A570D     | 2.08            | 17(16.346)                                | 66(0.569)      | 5953(2.036)    | 1236827(7.845)   |
| 46    | S:T604N     | 260.01          | 1(0.962)                                  | 0(0)           | 7(0.002)       | 583(0.004)       |
| 47    | S:D614G     | 0.73            | 75(72.115)                                | 11515(99.344)  | 284642(97.352) | 15644346(99.234) |
| 48    | S:H655Y     | 0.32            | 18(17.308)                                | 3951(34.087)   | 138317(47.307) | 8426910(53.453)  |
| 49    | S:Q675H     | 3.02            | 1(0.962)                                  | 9(0.078)       | 851(0.291)     | 50220(0.319)     |
| 50    | S:T676I     | 48.55           | 2(1.923)                                  | 2(0.017)       | 75(0.026)      | 6244(0.04)       |
| 51    | S:N679K     | 0.29            | 16(15.385)                                | 3926(33.871)   | 137427(47.002) | 8261869(52.406)  |
| 52    | S:P681H     | 0.59            | 37(35.577)                                | 4033(34.794)   | 143935(49.228) | 9565862(60.677)  |
| 53    | S:P681R     | 1.18            | 36(34.615)                                | 6266(54.059)   | 110523(37.801) | 4606647(29.221)  |
| 54    | S:T716I     | 2.57            | 21(20.192)                                | 64(0.552)      | 6047(2.068)    | 1238315(7.855)   |
| 55    | S:N764K     | 0.31            | 16(15.385)                                | 3847(33.19)    | 120493(41.211) | 7826670(49.646)  |
| 56    | S:D796Y     | 0.33            | 18(17.308)                                | 3836(33.095)   | 124283(42.507) | 8150963(51.703)  |
| 57    | S:G798D     | 14.82           | 1(0.962)                                  | 73(0.63)       | 1857(0.635)    | 10232(0.065)     |
| 58    | S:N856K     | 0.06            | 1(0.962)                                  | 334(2.882)     | 12998(4.446)   | 2563941(16.263)  |
| 59    | S:S929I     | 78.50           | 2(1.923)                                  | 9(0.078)       | 152(0.052)     | 3862(0.024)      |
| 60    | S:D950N     | 0.86            | 25(24.038)                                | 4563(39.367)   | 84291(28.829)  | 4381998(27.796)  |
| 61    | S:Q954H     | 0.30            | 16(15.385)                                | 3932(33.923)   | 128498(43.949) | 8099585(51.377)  |
| 62    | S:N969K     | 0.30            | 16(15.385)                                | 3912(33.75)    | 127504(43.609) | 8115982(51.481)  |
| 63    | S:L981F     | 0.06            | 1(0.962)                                  | 318(2.744)     | 12901(4.412)   | 2565539(16.274)  |
| 64    | S:S982A     | 2.02            | 16(15.385)                                | 62(0.535)      | 6014(2.057)    | 1198821(7.604)   |
| 65    | S:Q1071H    | 223.37          | 11(10.577)                                | 148(1.277)     | 4760(1.628)    | 7465(0.047)      |
| 66    | S:H1101D    | 426.61          | 9(8.654)                                  | 60(0.518)      | 2320(0.793)    | 3198(0.02)       |
| 67    | S:D1118H    | 2.01            | 16(15.385)                                | 54(0.466)      | 6066(2.075)    | 1207740(7.661)   |
| 68    | S:D1153Y    | 15.39           | 1(0.962)                                  | 9(0.078)       | 709(0.242)     | 9849(0.062)      |
| 69    | S:K1245R    | 170.90          | 1(0.962)                                  | 0(0)           | 19(0.006)      | 887(0.006)       |

AA; amino acid, \*Ratio; is an estimated value derived by dividing the percentage of a particular mutation observed in this study (fourth column) with percentage of the same mutation reported globally (last column).



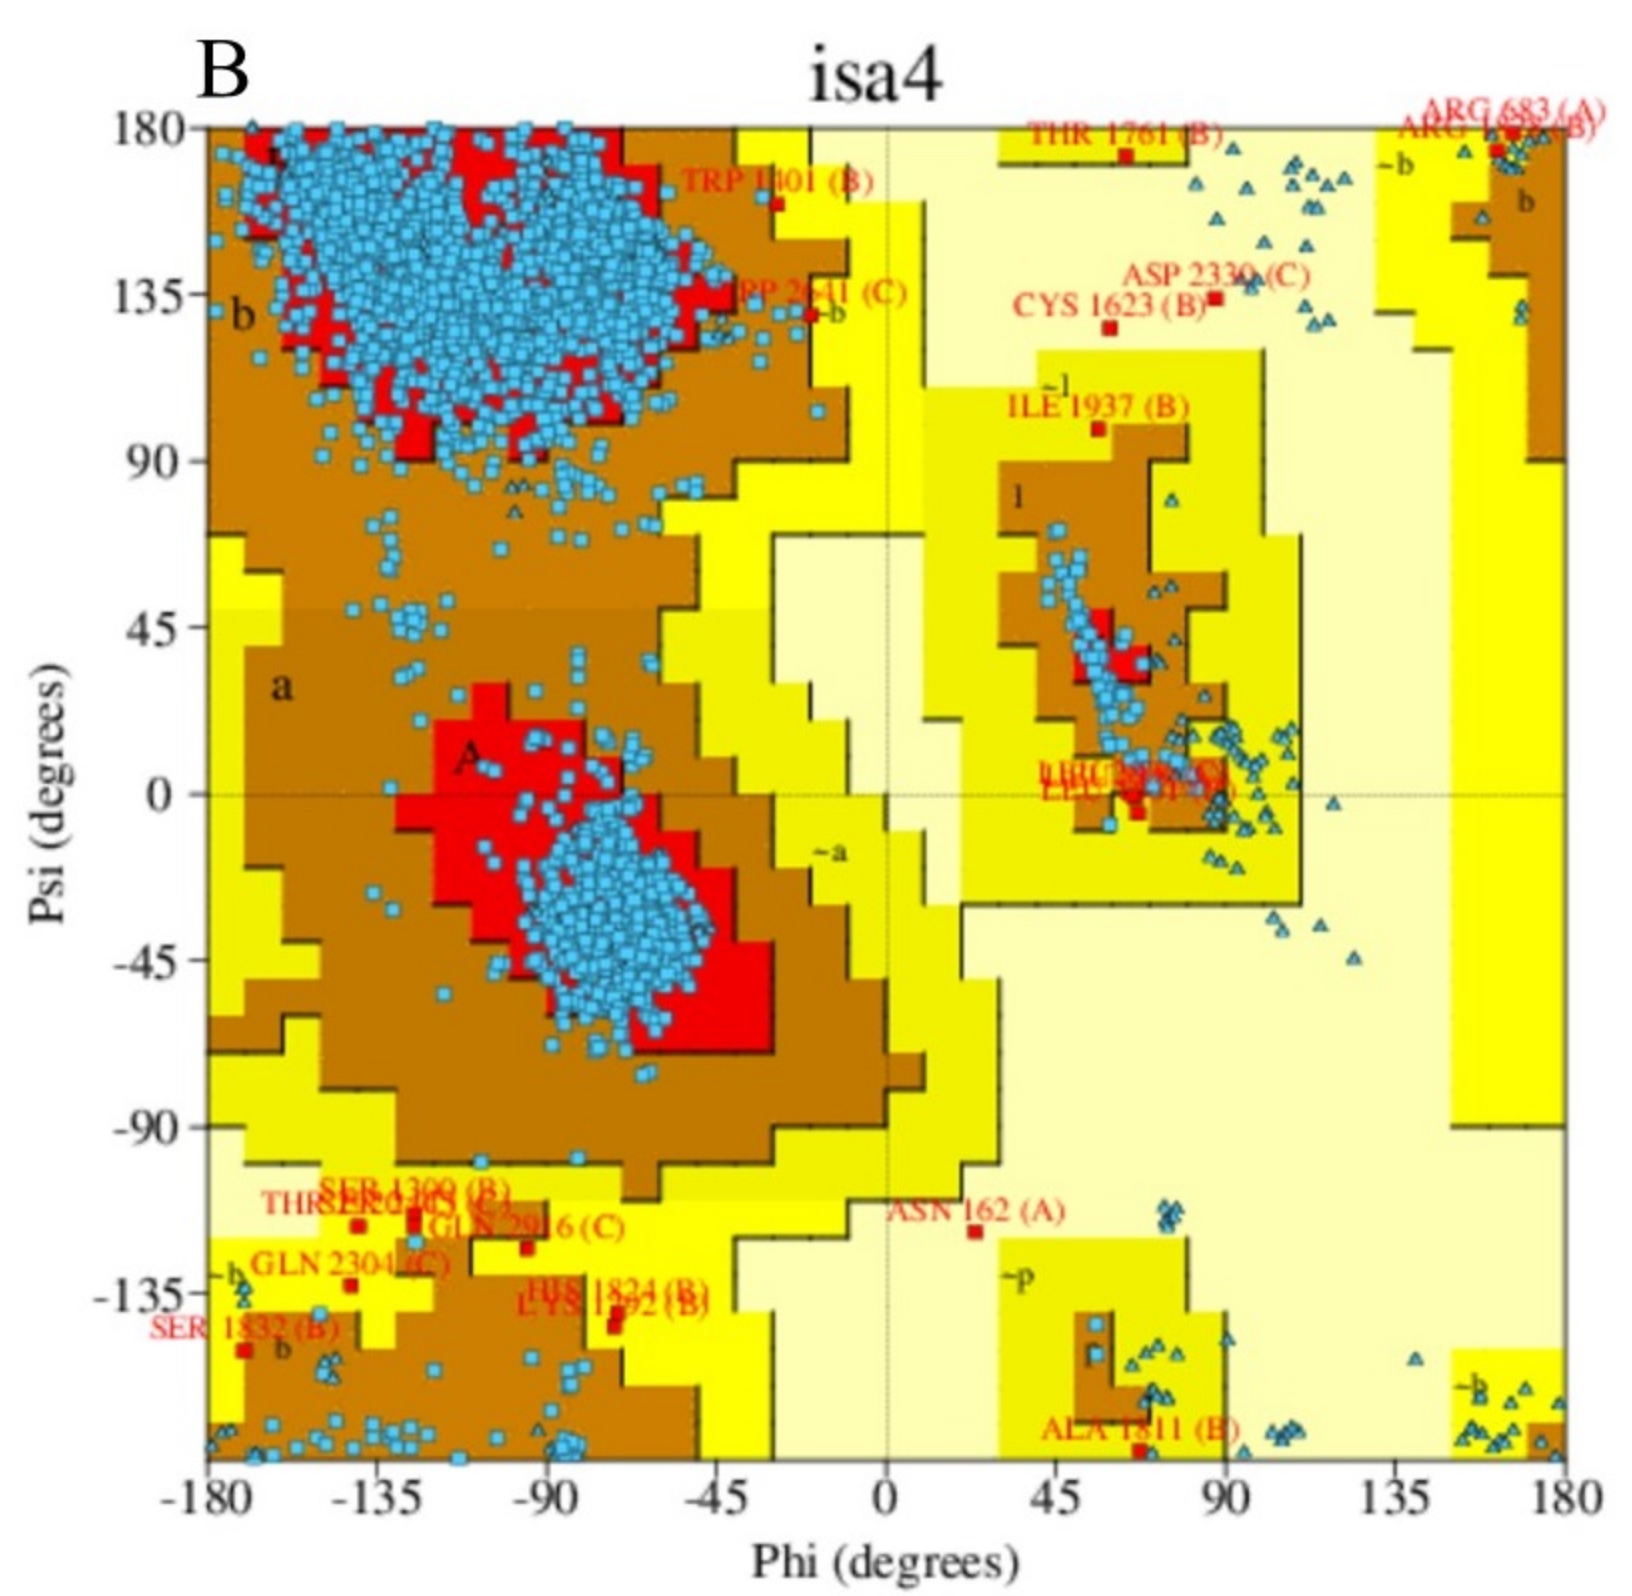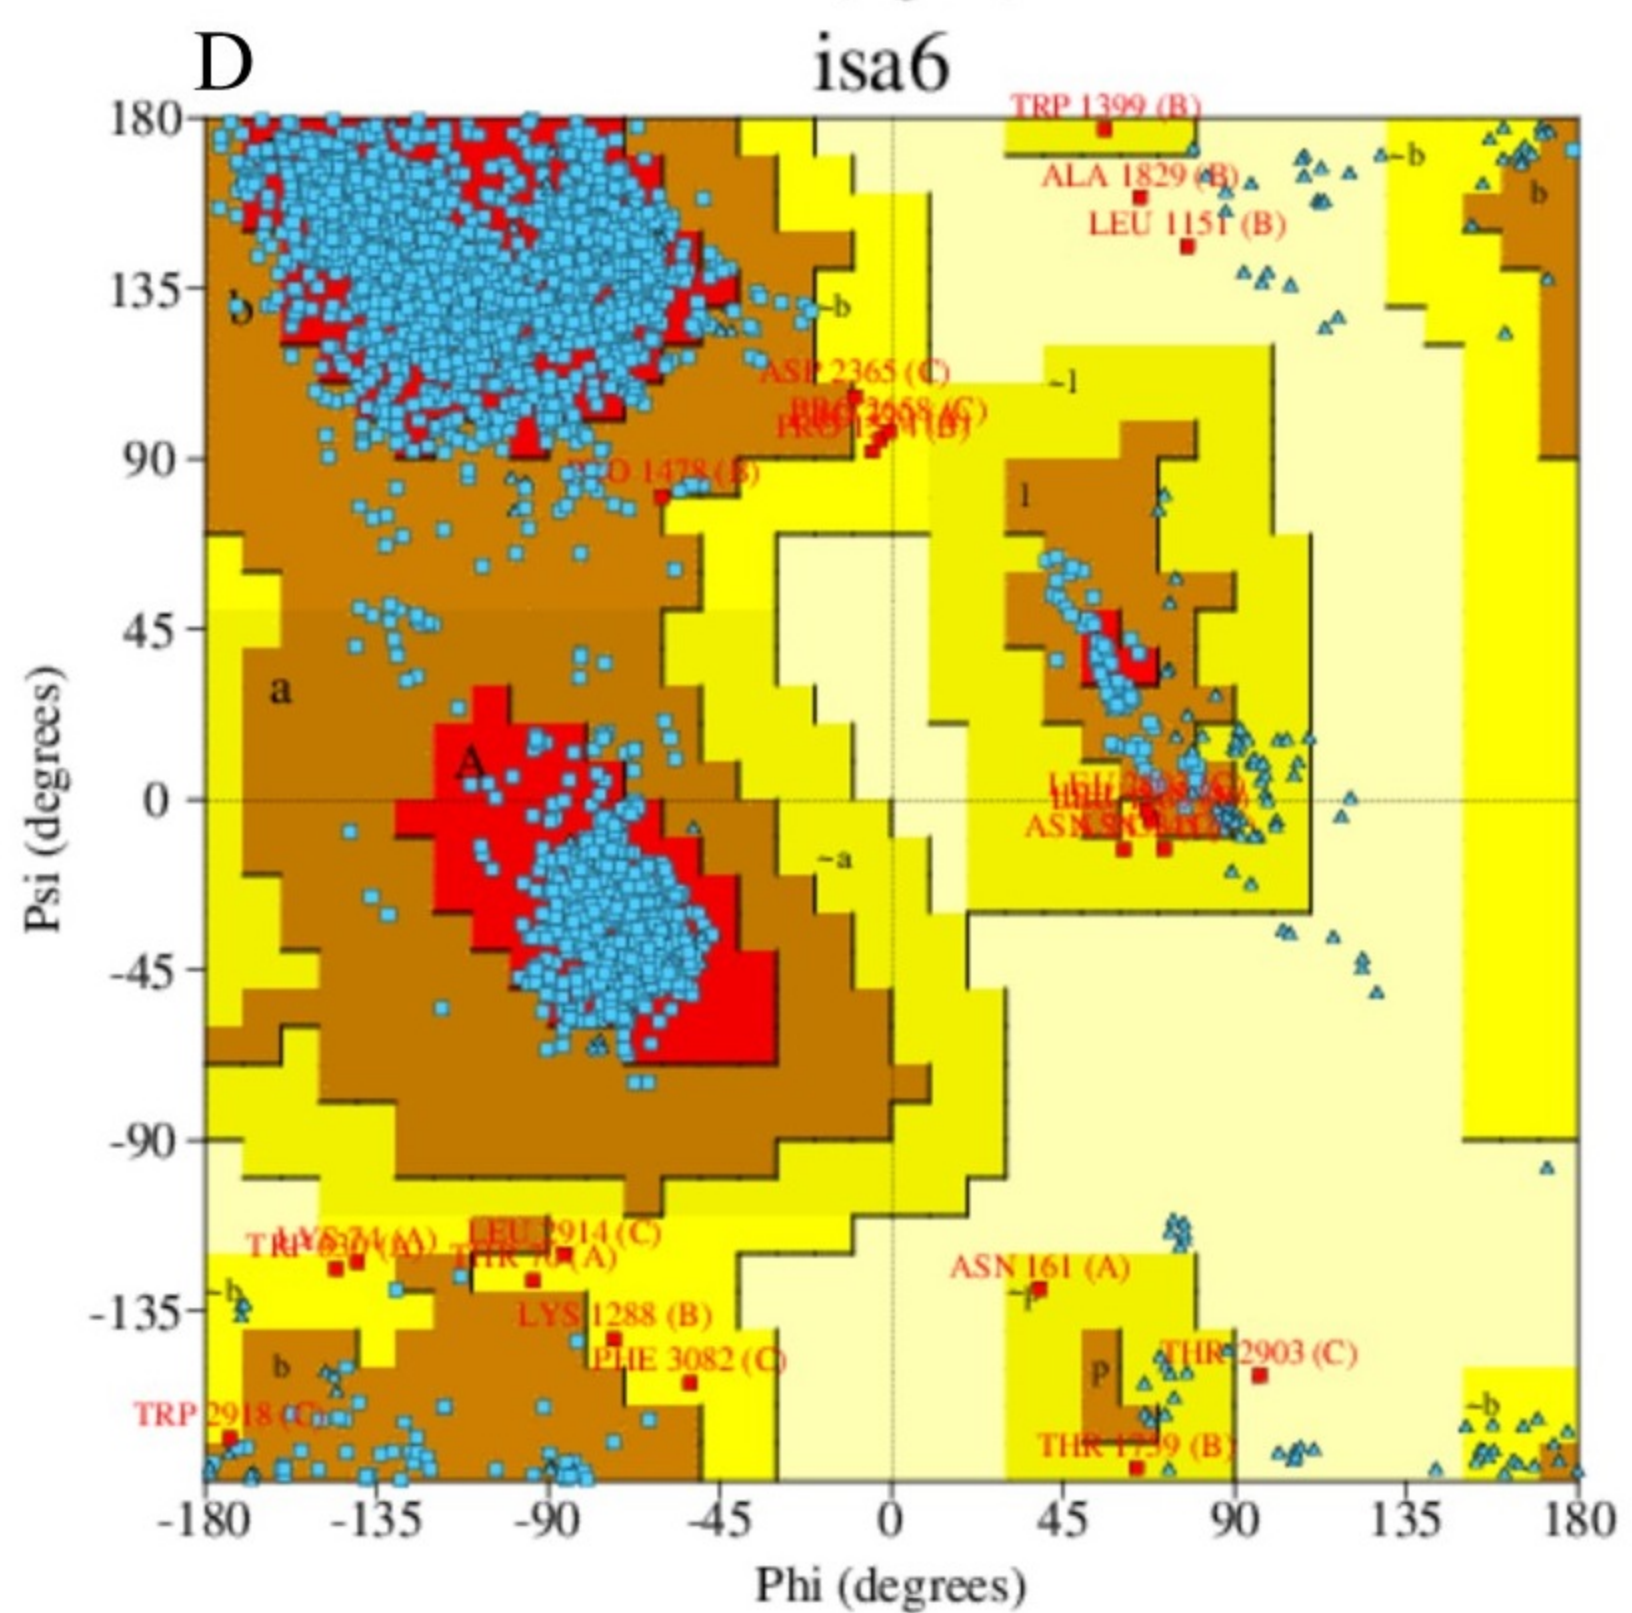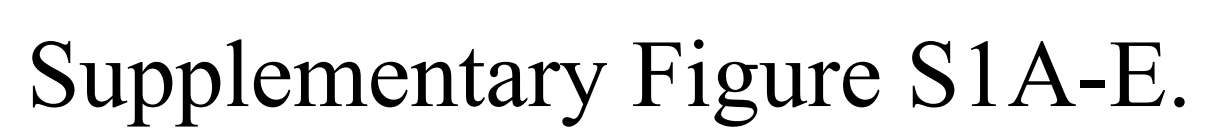

Supplementary Figure S1A-E.



### **Supplementary Figure S1.**

**A.** Validation of the modeled Alpha variant (sample id 543905) spike protein using the Ramachandran plot of PROCHECK analysis indicated 90.9% (2764), 8.5% (259), 0.5% (16), and 0.1% (3) residues belong to the most favored regions [A, B, and L], additionally allowed regions, generously allowed regions, and disallowed regions, respectively. It is a good-quality model based on more than 90% of the residues that fall in the most favored regions [A, B, and L].

**B.** Validation of the modeled Delta variant (sample ID 735516) spike protein using the Ramachandran plot of PROCHECK analysis indicated 91.1% (2772), 8.2% (249), 0.6% (18), and 0.1% (3) residues belong to the most favored regions [A, B, and L], additionally allowed regions, generously allowed regions, and disallowed regions, respectively. It is a good-quality model based on more than 90% of the residues that fall in the most favored regions [A, B, and L].

**C.** Validation of the modeled Kappa variant (sample ID 46696) spike protein using Ramachandran plot of PROCHECK analysis indicated 91.2% (2808), 8.1% (249), 0.5% (16), and 0.2% (5) residues belong to the most favored regions [A, B, and L], additionally allowed regions, generously allowed regions, and disallowed regions, respectively. It is a good-quality model based on more than 90% of the residues that fall in the most favored regions [A, B, and L].

**D.** Validation of modeled Omicron variant (sample id 1623722) spike protein using Ramachandran plot of PROCHECK analysis indicating 91.0% (2770), 8.4% (256), 0.5% (16), and 0.1% (3) residues belong to the most favored regions [A,B,L], additionally allowed regions, generously allowed regions, and disallowed regions, respectively. It is a good-quality model based on more than 90% of the residues that fall in the most favored regions [A, B, and L].

**E.** Validation of the modeled unnamed variant (sample id 1599310) spike protein using the Ramachandran plot of PROCHECK analysis indicated 91.2% (2772), 8.2% (248), 0.5% (14), and 0.2% (5) residues belong to the most favored regions [A, B, and L], additionally allowed regions, generously allowed regions, and disallowed regions, respectively. It is a good-quality model based on more than 90% of the residues that fall in the most favored regions [A, B, and L].

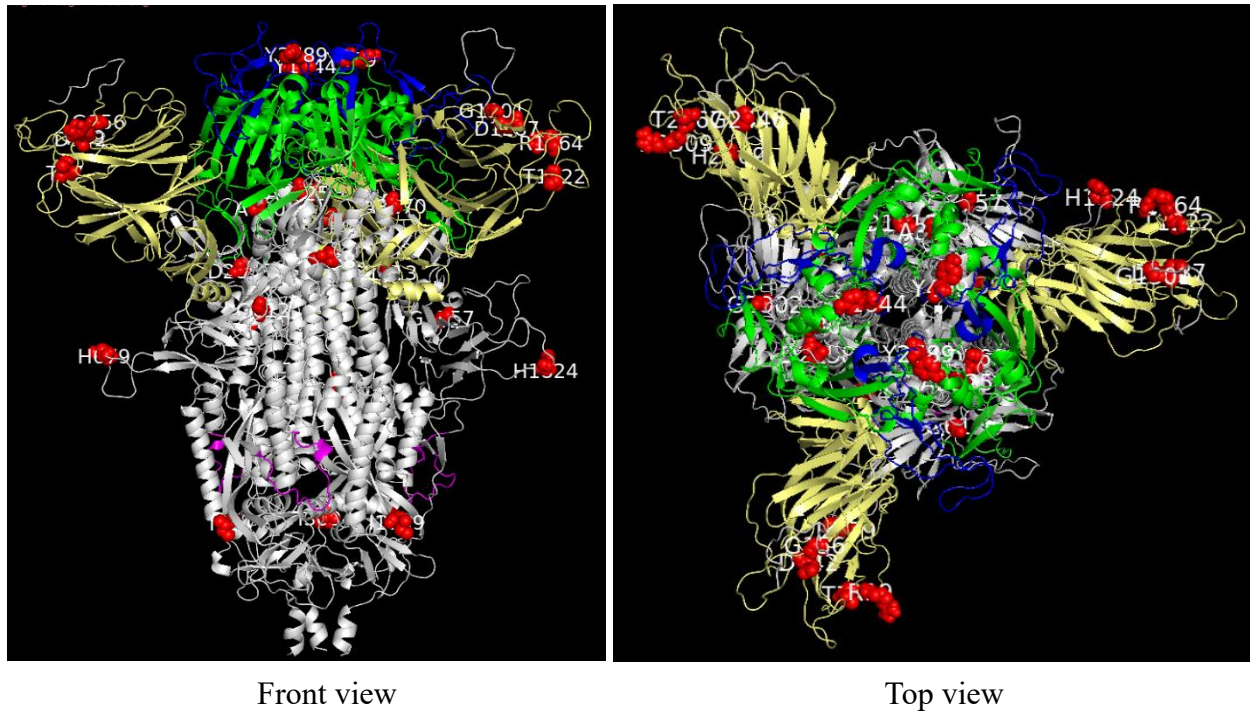

Supplementary Figure S2. Schematic of the SARS-CoV-2 spike protein primary structure (trimer) generated from the **Alpha variant (sample ID 543905)** sequence of this study. Different domains are shown with different colors: N-terminal domain (NTD): yellow; receptor-binding domain (RBD): green; receptor binding motif (RBM): blue; fusion peptide (FP): magenta; other parts of S1 and S2: silver (gray 90%). Mutations are marked with a red sphere and labeled with the residue name (a single-letter code) and position. Mutations are predominantly observed in the NTD and RBM regions.

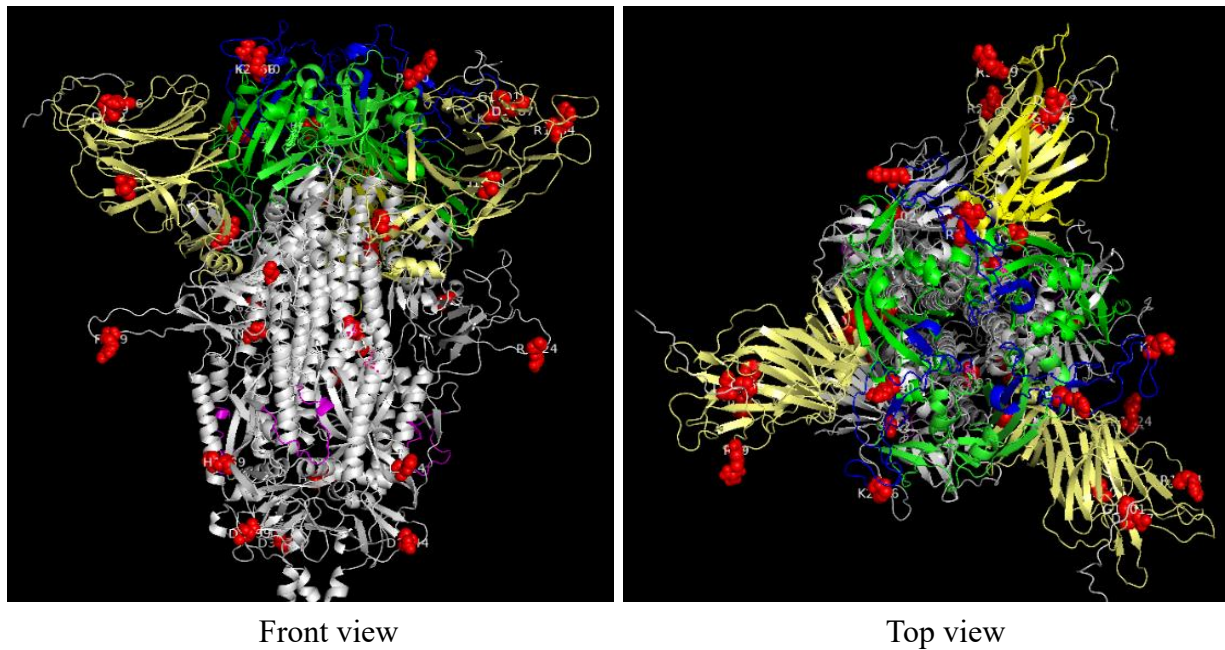

Supplementary Figure S3. Schematic of the SARS-CoV-2 spike protein primary structure (trimer) generated from the **Delta variant (sample ID 735516)** sequence of this study. Different domains are shown with distinct colors: N-terminal domain (NTD): yellow; receptor-binding domain (RBD): green; receptor binding motif (RBM): blue; fusion peptide (FP): magenta; other parts of S1 and S2: silver (gray 90%). Mutations are marked with a red sphere and labeled with the residue name (a single-letter code) and position. Mutations are predominantly observed in the NTD and RBM regions.

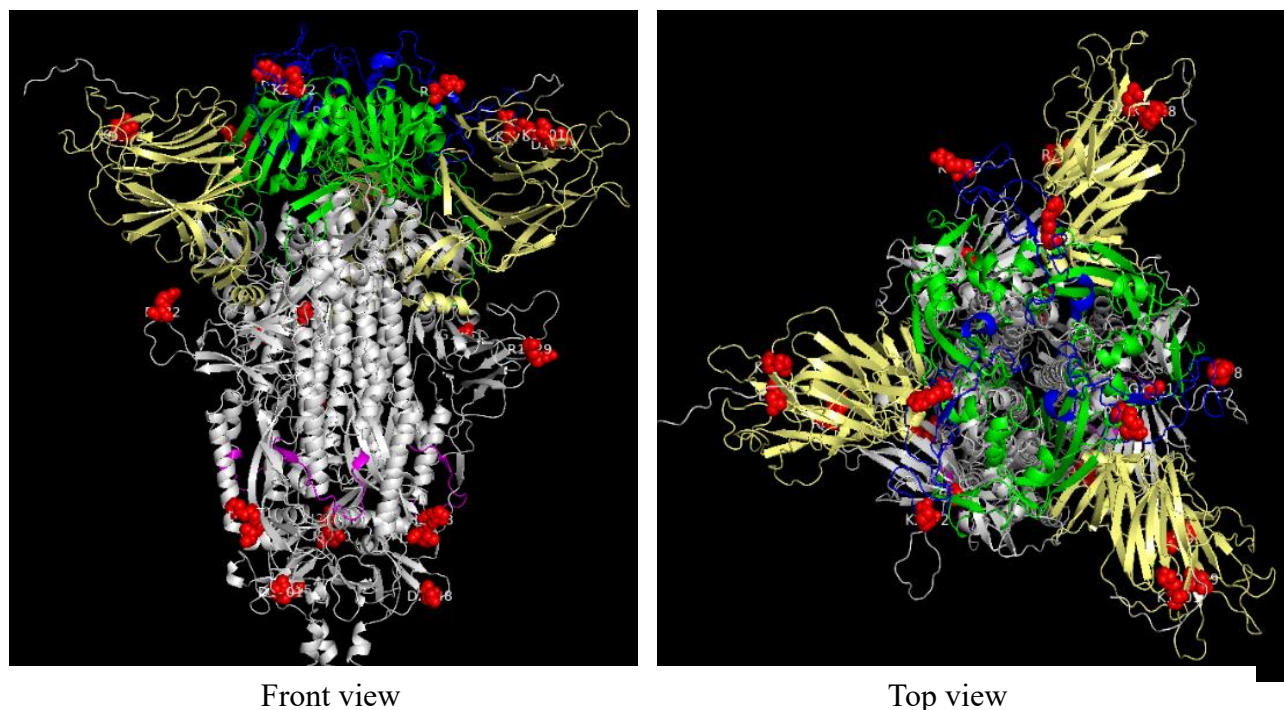

**Supplementary Figure S4.** Schematic of the SARS-CoV-2 spike protein primary structure (trimer) generated from the **Kappa variant (sample ID 46696)** sequence of this study. Different domains are shown with distinct colors: N-terminal domain (NTD): yellow; receptor-binding domain (RBD): green; receptor binding motif (RBM): blue; fusion peptide (FP): magenta; other parts of S1 and S2: silver (gray 90%). Mutations are marked with a red sphere and labeled with the residue name (a single-letter code) and position. Mutations are predominantly observed in the NTD and RBM regions.









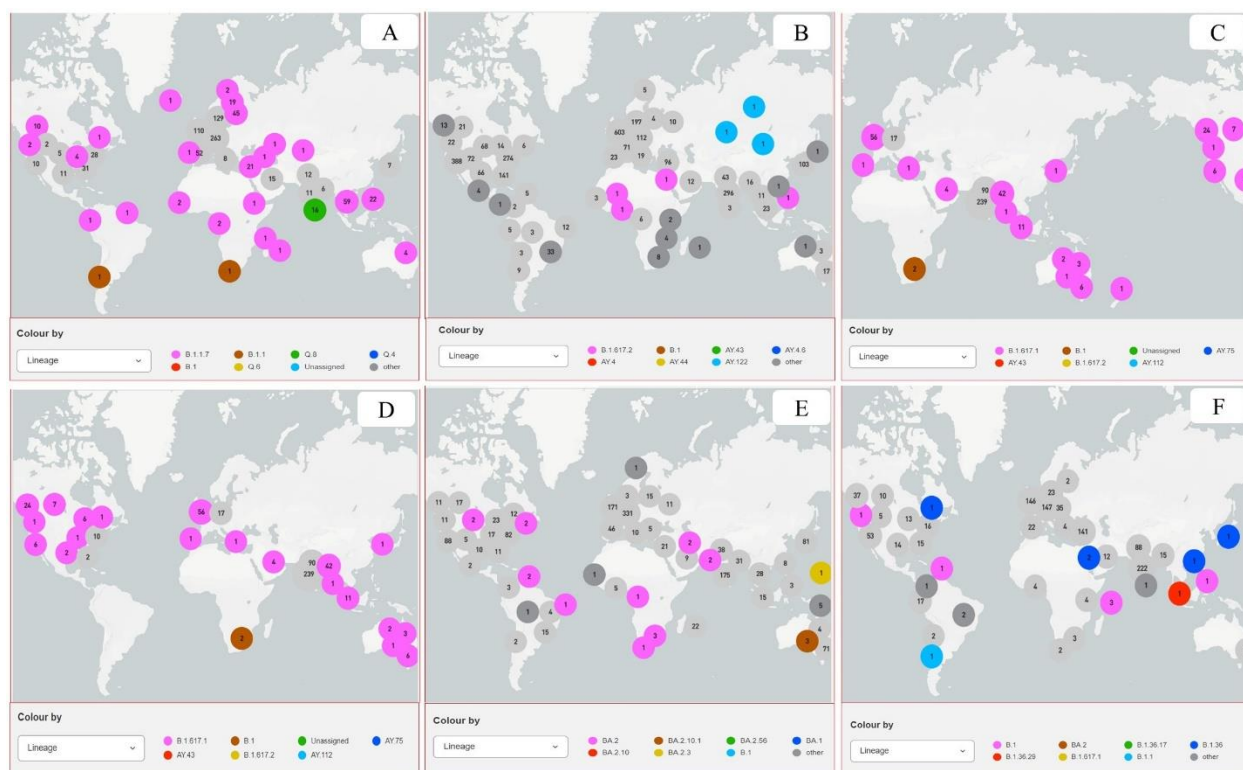

**Supplementary Figure S7.** Global geographic distribution of the genetic variants of SARS-CoV-2 similar to Alpha (A), Delta (B), Kappa (C and D), Omicron (E), and unnamed (F) variants reported in this study. Source: GISAID (Epicov/Audacity Instant). available at: <https://www.epicov.org>. Accessed on May 24, 2023.

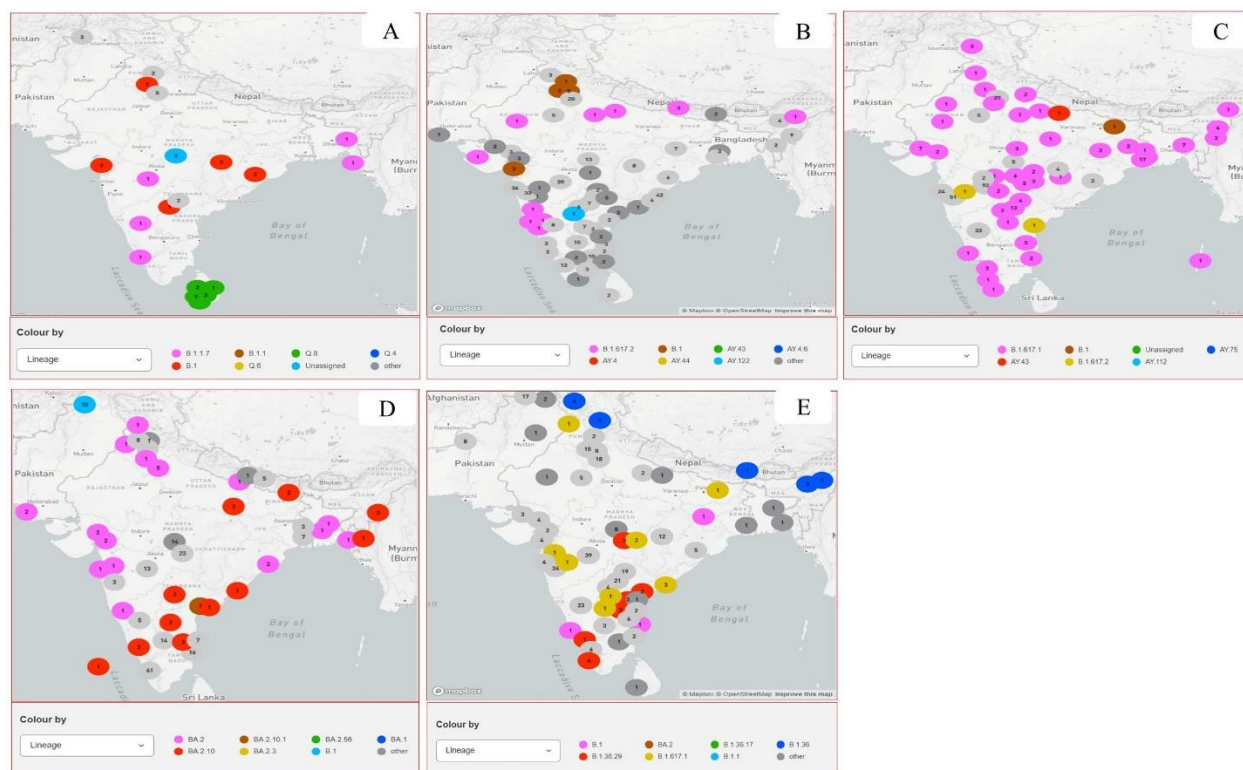

**Supplementary Figure S8.** Local (India) geographic distribution of the genetic variants of SARS-CoV-2 similar to Alpha (A), Delta (B), Kappa (C), Omicron (D), and unnamed (E) variants reported in this study. Source: GISAID (Epicov/Audacity Instant). available at: <https://www.epicov.org>. Accessed on May 24, 2023.

**Bonded interactions within the AA residues of SARS CoV2 spike protein (trimer)**

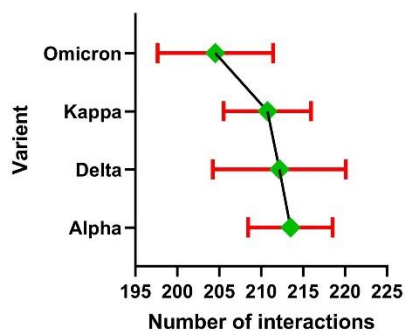

**Non-bonded interactions within the AA residues of SARS CoV2 spike protein (trimer)**

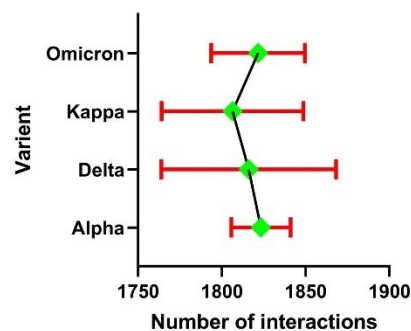

**Bonded interactions between the SARS CoV2 spike protein and hACE2**

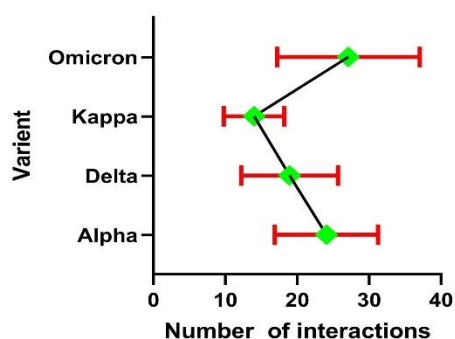

**Non-bonded interactions between the SARS CoV2 spike protein and hACE2**

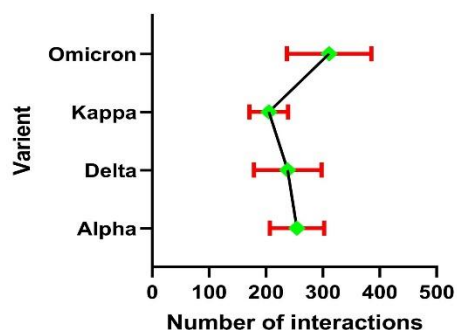

**Supplementary Figure S9.** Number of bonded and non-bonded interactions observed between the amino acid residues within the spike trimer and spike-ACE2 proteins generated through protein-protein docking studies. Different variants observed in the study are reported on the "Y" axis, whereas the number of interactions is indicated on the "X" axis. The rhombus (green) represents the data mean, and the red line indicates the standard deviation. Except for non-bonded interactions within the spike trimer, all other plots showed significant differences.
